# Supplementary material for: Association of Eviction With Adverse Birth Outcomes Among Women in Georgia, 2000 to 2016
Source: PubMed Central journal article supplement (PMC7922232; doi:10.1001/jamapediatrics.2020.6550), 2021-03-01
Supplement: jamapediatr-e206550-s001.pdf [file jamapediatr-e206550-s001.pdf]

## Supplementary Online Content

Himmelstein G, Desmond M. Association of eviction with adverse birth outcomes among women in Georgia, 2000 to 2016. *JAMA Pediatr*. Published online March 1, 2021. doi:10.1001/jamapediatrics.2020.6550

**eFigure.** Birth Weight Distributions of Infants Born to Georgia Mothers With and Without Eviction Actions at Any Time, 2000-2016

**eTable 1.** Association of Eviction Actions During Pregnancy With Birth Outcomes, Adjusted for Other Characteristics, Including Coefficients for All Covariates

**eTable 2.** Association of Eviction Actions During Pregnancy With Birth Outcomes According to Trimester of Pregnancy, Adjusted for Other Characteristics, Including Coefficients for All Covariates

**eTable 3.** Characteristics and Birth Outcomes of Georgia Mothers With Eviction Actions During Pregnancy by Trimester

**eTable 4.** Association of Eviction Actions Not Resulting in Eviction Judgment During Pregnancy With Birth Outcomes, Adjusted for Other Characteristics

**eTable 5.** Association of Eviction Actions During Pregnancy With Birth Outcomes, Including Mother Fixed Effects, Adjusted for Other Characteristics

**eTable 6.** Association of Eviction Actions During Pregnancy With Birth Outcomes Among Mothers With Only 1 Eviction Action, Adjusted for Other Characteristics

**eTable 7.** Association of Eviction Actions During Pregnancy With Birth Outcomes in Atlanta, Georgia, Adjusted for Other Characteristics

This supplementary material has been provided by the authors to give readers additional information about their work.

**eFigure. Birth Weight Distributions of Infants Born to Georgia Mothers With and Without Eviction Actions at Any Time, 2000-2016**

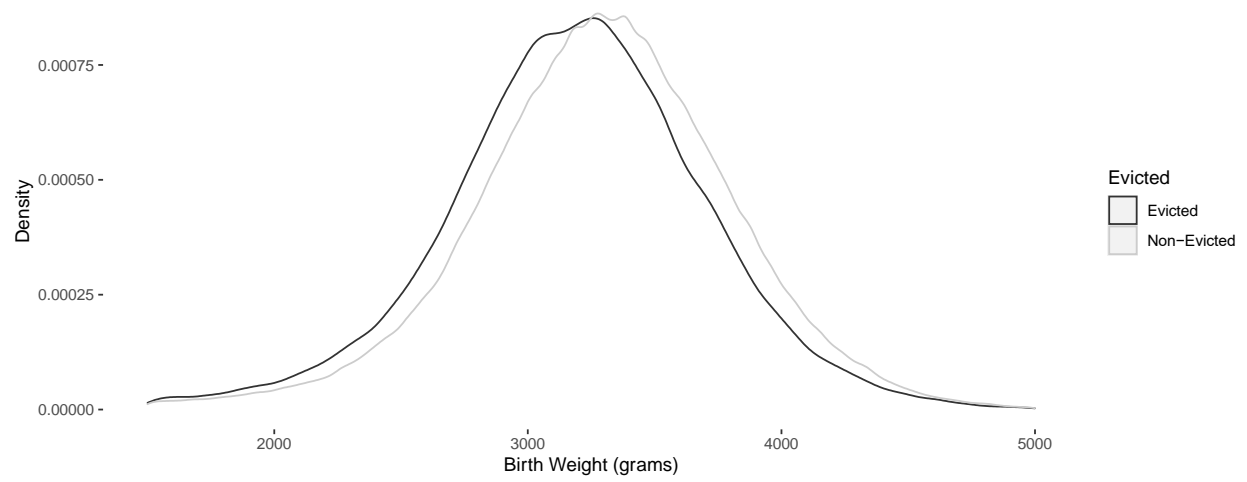

**eTable 1. Association of Eviction Actions During Pregnancy With Birth Outcomes, Adjusted for Other Characteristics, Including Coefficients for All Covariates**

|                                         | <b>Infant Birth Weight, Grams</b><br>N = 85,438<br>(95% CI) | <b>Low Birth Weight, Percent of Births</b><br>N = 85,438<br>(95% CI) | <b>Infant Deaths per Thousand</b><br>N = 85,438<br>(95% CI) | <b>Gestational Age, Weeks</b><br>N = 42,697<br>(95% CI) | <b>Premature, Percent of Births</b><br>N = 42,697<br>(95% CI) |
|-----------------------------------------|-------------------------------------------------------------|----------------------------------------------------------------------|-------------------------------------------------------------|---------------------------------------------------------|---------------------------------------------------------------|
| <b>Eviction Action During Pregnancy</b> | <b>-26.88***</b><br>(-39.53, -14.24)                        | <b>0.88***</b><br>(0.23, 1.54)                                       | <b>1.85*</b><br>(-0.19, 3.89)                               | <b>-0.09***</b><br>(-0.16, -0.03)                       | <b>1.14**</b><br>(0.21, 2.06)                                 |
| <b>Parity</b>                           |                                                             |                                                                      |                                                             |                                                         |                                                               |
| Parity 1                                | Reference                                                   | Reference                                                            | Reference                                                   | Reference                                               | Reference                                                     |
| Parity 2                                | 61.61***<br>(50.54, 72.67)                                  | -2.55***<br>(-3.12, -1.98)                                           | -1.78*<br>(-3.57, 0.00)                                     | -0.11***<br>(-0.17, -0.04)                              | -0.01<br>(-0.94, 0.92)                                        |
| Parity 3                                | 72.90***<br>(60.87, 84.92)                                  | -2.53***<br>(-3.15, -1.91)                                           | -0.94<br>(-2.88, 0.99)                                      | -0.16***<br>(-0.23, -0.09)                              | 0.74<br>(-0.23, 1.71)                                         |
| Parity 4                                | 51.11***<br>(36.73, 65.50)                                  | -1.60***<br>(-2.34, -0.86)                                           | 0.48<br>(-1.84, 2.79)                                       | -0.27***<br>(-0.35, -0.19)                              | 2.08***<br>(0.97, 3.20)                                       |
| Parity 5+                               | 48.65***<br>(33.64, 63.67)                                  | -1.06***<br>(-1.83, -0.28)                                           | 0.31<br>(-2.11, 2.73)                                       | -0.35***<br>(-0.42, -0.27)                              | 3.71***<br>(2.59, 4.83)                                       |
| <b>Maternal Age</b>                     |                                                             |                                                                      |                                                             |                                                         |                                                               |
| < 19 years                              | Reference                                                   | Reference                                                            | Reference                                                   | Reference                                               | Reference                                                     |
| 19-34 years                             | 1.18<br>(-17.01, 19.37)                                     | 0.82*<br>(-0.12, 1.75)                                               | 1.66<br>(-1.27, 4.59)                                       | -0.11*<br>(-0.24, 0.02)                                 | 1.77*<br>(-0.03, 3.57)                                        |
| 35+ years                               | -24.80**<br>(-47.85, -1.76)                                 | 3.96***<br>(2.78, 5.15)                                              | 1.54<br>(-2.18, 5.25)                                       | -0.35***<br>(-0.49, -0.20)                              | 5.57***<br>(3.50, 7.64)                                       |
| <b>Maternal Race</b>                    |                                                             |                                                                      |                                                             |                                                         |                                                               |
| White                                   | Reference                                                   | Reference                                                            | Reference                                                   | Reference                                               | Reference                                                     |
| Black or African-American               | -185.48***<br>(-196.83, -174.12)                            | 4.39***<br>(3.81, 4.98)                                              | 3.04***<br>(1.21, 4.87)                                     | -0.30***<br>(-0.37, -0.24)                              | 3.16***<br>(2.25, 4.08)                                       |
| <b>Maternal Education</b>               |                                                             |                                                                      |                                                             |                                                         |                                                               |
| < 9th grade                             | Reference                                                   | Reference                                                            | Reference                                                   | Reference                                               | Reference                                                     |
| 9th through 11th Grade                  | -43.53***<br>(-71.21, -15.85)                               | 1.12<br>(-0.31, 2.55)                                                | -1.17<br>(-5.64, 3.29)                                      | -0.24**<br>(-0.42, -0.05)                               | 3.40**<br>(0.78, 6.02)                                        |
| High School Diploma/GED                 | 4.57<br>(-22.77, 31.91)                                     | -0.15<br>(-1.56, 1.25)                                               | -2.15<br>(-6.56, 2.26)                                      | -0.20**<br>(-0.38, -0.02)                               | 2.32*<br>(-0.25, 4.88)                                        |

|                        |                            |                            |                         |                         |                         |
|------------------------|----------------------------|----------------------------|-------------------------|-------------------------|-------------------------|
| Some College or Higher | 35.20**<br>(7.47, 62.93)   | -1.10<br>(-2.52, 0.33)     | -4.30*<br>(-8.77, 0.17) | -0.16*<br>(-0.34, 0.02) | 2.00<br>(-0.58, 4.59)   |
| <b>Marital status</b>  |                            |                            |                         |                         |                         |
| Unmarried              | Reference                  | Reference                  | Reference               | Reference               | Reference               |
| Married                | 55.32***<br>(45.43, 65.22) | -1.28***<br>(-1.79, -0.77) | -0.78<br>(-2.37, 0.81)  | 0.02<br>(-0.04, 0.08)   | -0.74*<br>(-1.53, 0.05) |

\*p<0.1; \*\*p<0.05; \*\*\*p<0.01

Multivariate ordinary least squares models with zip code and year fixed effects

GED= General Education Diploma

**eTable 2. Association of Eviction Actions During Pregnancy With Birth Outcomes According to Trimester of Pregnancy, Adjusted for Other Characteristics, Including Coefficients for All Covariates**

|                                                 | <b>Infant Birth Weight, Grams</b><br>N = 85,438<br>(95% CI) | <b>Low Birth Weight, Percent of Births</b><br>N = 85,438<br>(95% CI) | <b>Infant Deaths per Thousand</b><br>N = 85,438<br>(95% CI) | <b>Gestational Age, Weeks</b><br>N = 42,697<br>(95% CI) | <b>Premature, Percent of Births</b><br>N = 42,697<br>(95% CI) |
|-------------------------------------------------|-------------------------------------------------------------|----------------------------------------------------------------------|-------------------------------------------------------------|---------------------------------------------------------|---------------------------------------------------------------|
| <b>Trimester During Which Eviction Occurred</b> |                                                             |                                                                      |                                                             |                                                         |                                                               |
| 1 <sup>st</sup> Trimester of Pregnancy          | 4.34<br>(-21.38, 30.07)                                     | -0.81<br>(-2.14, 0.51)                                               | 2.93<br>(-1.22, 7.07)                                       | 0.05<br>(-0.08, 0.18)                                   | -0.06<br>(-1.93, 1.82)                                        |
| 2 <sup>nd</sup> Trimester of Pregnancy          | -34.74***<br>(-57.51, -11.97)                               | 1.42**<br>(0.25, 2.59)                                               | 2.02<br>(-1.65, 5.69)                                       | -0.12**<br>(-0.24, -0.01)                               | 1.41*<br>(-0.26, 3.09)                                        |
| 3 <sup>rd</sup> Trimester of Pregnancy          | -35.80***<br>(-52.91, -18.69)                               | 1.31***<br>(0.43, 2.19)                                              | 1.30<br>(-1.46, 4.06)                                       | -0.14***<br>(-0.22, -0.05)                              | 1.49**<br>(0.24, 2.73)                                        |
| <b>Parity</b>                                   |                                                             |                                                                      |                                                             |                                                         |                                                               |
| Parity 1                                        | Reference                                                   | Reference                                                            | Reference                                                   | Reference                                               | Reference                                                     |
| Parity 2                                        | 61.43***<br>(50.36, 72.49)                                  | -2.54***<br>(-3.11, -1.97)                                           | -1.79**<br>(-3.58, -0.01)                                   | -0.11***<br>(-0.17, -0.04)                              | 0.00<br>(-0.93, 0.93)                                         |
| Parity 3                                        | 72.61***<br>(60.59, 84.64)                                  | -2.51***<br>(-3.13, -1.89)                                           | -0.96<br>(-2.90, 0.98)                                      | -0.16***<br>(-0.23, -0.09)                              | 0.76<br>(-0.21, 1.73)                                         |
| Parity 4                                        | 50.84***<br>(36.45, 65.22)                                  | -1.58***<br>(-2.32, -0.84)                                           | 0.46<br>(-1.85, 2.78)                                       | -0.27***<br>(-0.35, -0.20)                              | 2.10***<br>(0.98, 3.21)                                       |
| Parity 5+                                       | 48.52***<br>(33.50, 63.54)                                  | -1.05***<br>(-1.82, -0.28)                                           | 0.31<br>(-2.12, 2.73)                                       | -0.35***<br>(-0.43, -0.27)                              | 3.72***<br>(2.59, 4.84)                                       |
| <b>Maternal Age</b>                             |                                                             |                                                                      |                                                             |                                                         |                                                               |
| Age < 19                                        | Reference                                                   | Reference                                                            | Reference                                                   | Reference                                               | Reference                                                     |
| Age 19-34                                       | 1.20<br>(-16.99, 19.38)                                     | 0.81*<br>(-0.12, 1.75)                                               | 1.66<br>(-1.27, 4.60)                                       | -0.11*<br>(-0.24, 0.02)                                 | 1.77*<br>(-0.03, 3.57)                                        |
| Age 35+                                         | -24.73**<br>(-47.77, -1.68)                                 | 3.96***<br>(2.77, 5.15)                                              | 1.54<br>(-2.18, 5.25)                                       | -0.35***<br>(-0.49, -0.20)                              | 5.57***<br>(3.49, 7.64)                                       |
| <b>Maternal Race</b>                            |                                                             |                                                                      |                                                             |                                                         |                                                               |
| White                                           | Reference                                                   | Reference                                                            | Reference                                                   | Reference                                               | Reference                                                     |

|                            |                                  |                            |                            |                            |                         |
|----------------------------|----------------------------------|----------------------------|----------------------------|----------------------------|-------------------------|
| Black or African-American  | -185.34***<br>(-196.70, -173.99) | 4.39***<br>(3.80, 4.97)    | 3.05***<br>(1.21, 4.88)    | -0.30***<br>(-0.37, -0.24) | 3.16***<br>(2.24, 4.07) |
| <b>Maternal Education</b>  |                                  |                            |                            |                            |                         |
| < 9th Grade                | Reference                        | Reference                  | Reference                  | Reference                  | Reference               |
| 9th through 11th Grade     | -43.66***<br>(-71.34, -15.98)    | 1.13<br>(-0.30, 2.55)      | -1.18<br>(-5.64, 3.28)     | -0.24**<br>(-0.42, -0.05)  | 3.41**<br>(0.79, 6.03)  |
| High School Diploma or GED | 4.50<br>(-22.84, 31.84)          | -0.15<br>(-1.56, 1.26)     | -2.15<br>(-6.56, 2.25)     | -0.20**<br>(-0.38, -0.02)  | 2.32*<br>(-0.25, 4.89)  |
| Some College or Higher     | 35.11**<br>(7.38, 62.84)         | -1.09<br>(-2.52, 0.34)     | -4.31*<br>(-8.78, 0.16)    | -0.16*<br>(-0.34, 0.02)    | 2.01<br>(-0.58, 4.59)   |
| <b>Marital Status</b>      |                                  |                            |                            |                            |                         |
| Unmarried                  | Reference                        | Reference                  | Reference                  | Reference                  | Reference               |
| Married                    | 55.38***<br>(45.49, 65.27)       | -1.28***<br>(-1.79, -0.77) | -0.000.78<br>(-2.37, 0.82) | 0.02<br>(-0.04, 0.08)      | -0.74*<br>(-1.53, 0.05) |

\*p<0.1; \*\*p<0.05; \*\*\*p<0.01

Multivariate ordinary least squares models with zip code and year fixed effects

GED= General Education Diploma

**eTable 3. Characteristics and Birth Outcomes of Georgia Mothers With Eviction Actions During Pregnancy by Trimester**

|                                  | <b>Eviction Action During First Trimester of Pregnancy</b> | <b>Eviction Action During Second Trimester of Pregnancy</b> | <b>Eviction Action During Third Trimester of Pregnancy</b> |
|----------------------------------|------------------------------------------------------------|-------------------------------------------------------------|------------------------------------------------------------|
|                                  | N=2,199                                                    | N=2,802                                                     | N=5,134                                                    |
| <b>Mean Maternal Age (SD)</b>    | 27.18 (5.29)                                               | 27.41 (5.41)                                                | 27.31 (5.36)                                               |
| <b>Race (%)</b>                  |                                                            |                                                             |                                                            |
| White                            | 445 (20.2)                                                 | 535 (19.1)                                                  | 863 (16.8)                                                 |
| American Indian/Alaska Native    | 2 (0.1)                                                    | 6 (0.2)                                                     | 9 (0.2)                                                    |
| Asian                            | 10 (0.5)                                                   | 15 (0.5)                                                    | 18 (0.4)                                                   |
| Black or African-American        | 1669 (75.9)                                                | 2152 (76.8)                                                 | 4075 (79.4)                                                |
| Multiracial                      | 48 (2.2)                                                   | 69 (2.5)                                                    | 125 (2.4)                                                  |
| Native Hawaiian/Pacific Islander | 0 (0.0)                                                    | 1 (0.0)                                                     | 2 (0.0)                                                    |
| Unknown                          | 25 (1.1)                                                   | 24 (0.9)                                                    | 42 (0.8)                                                   |
| <b>Education (%)</b>             |                                                            |                                                             |                                                            |
| Less than 9th Grade              | 27 (1.2)                                                   | 38 (1.4)                                                    | 77 (1.5)                                                   |
| 9th through 11th Grade           | 402 (18.3)                                                 | 460 (16.4)                                                  | 803 (15.6)                                                 |
| High School Diploma or GED       | 875 (39.8)                                                 | 1138 (40.6)                                                 | 2064 (40.2)                                                |
| Some College or Higher           | 809 (36.8)                                                 | 1081 (38.6)                                                 | 2049 (39.9)                                                |
| Missing                          | 86 (3.9)                                                   | 85 (3.0)                                                    | 141 (2.7)                                                  |
| <b>Marital Status (%)</b>        |                                                            |                                                             |                                                            |
| Unmarried                        | 1693 (77.0)                                                | 2127 (75.9)                                                 | 3900 (76.0)                                                |
| Married                          | 501 (22.8)                                                 | 669 (23.9)                                                  | 1217 (23.7)                                                |
| Missing                          | 5 (0.2)                                                    | 6 (0.2)                                                     | 17 (0.3)                                                   |

**eTable 4. Association of Eviction Actions Not Resulting in Eviction Judgment During Pregnancy With Birth Outcomes, Adjusted for Other Characteristics**

|                                         | <b>Infant Birth Weight, Grams</b><br>N = 57,256<br>(95% CI) | <b>Low Birth Weight, Percent of Births</b><br>N = 57,256<br>(95% CI) | <b>Infant Deaths per Thousand</b><br>N = 57,256<br>(95% CI) | <b>Gestational Age, Weeks</b><br>N= 28,864<br>(95% CI) | <b>Premature, Percent of Births</b><br>N = 28,864<br>(95% CI) |
|-----------------------------------------|-------------------------------------------------------------|----------------------------------------------------------------------|-------------------------------------------------------------|--------------------------------------------------------|---------------------------------------------------------------|
| <b>Eviction Action During Pregnancy</b> | <b>-29.25***</b><br>(-43.69, -14.81)                        | <b>1.10***</b><br>(0.35, 1.85)                                       | <b>1.72</b><br>(-0.62, 4.06)                                | <b>-0.11***</b><br>(-0.19, -0.03)                      | <b>1.47***</b><br>(0.40, 2.54)                                |
| <b>Parity</b>                           |                                                             |                                                                      |                                                             |                                                        |                                                               |
| Parity 1                                | Reference                                                   | Reference                                                            | Reference                                                   | Reference                                              | Reference                                                     |
| Parity 2                                | 60.29***<br>(46.55, 74.03)                                  | -2.76***<br>(-3.48, -2.05)                                           | -1.38<br>(-3.61, 0.85)                                      | -0.07*<br>(-0.16, 0.01)                                | -0.46<br>(-1.60, 0.69)                                        |
| Parity 3                                | 72.91***<br>(58.05, 87.77)                                  | -2.64***<br>(-3.41, -1.87)                                           | -1.25<br>(-3.66, 1.16)                                      | -0.13***<br>(-0.22, -0.05)                             | 0.18<br>(-1.02, 1.37)                                         |
| Parity 4                                | 42.98***<br>(25.32, 60.64)                                  | -1.52***<br>(-2.44, -0.60)                                           | 1.62<br>(-1.24, 4.48)                                       | -0.28***<br>(-0.38, -0.19)                             | 2.13***<br>(0.76, 3.50)                                       |
| Parity 5+                               | 42.22***<br>(23.97, 60.48)                                  | -0.99**<br>(-1.94, -0.04)                                            | 0.25<br>(-2.71, 3.21)                                       | -0.32***<br>(-0.42, -0.23)                             | 3.33***<br>(1.96, 4.71)                                       |
| <b>Maternal Age</b>                     |                                                             |                                                                      |                                                             |                                                        |                                                               |
| Age <19                                 | Reference                                                   | Reference                                                            | Reference                                                   | Reference                                              | Reference                                                     |
| Age 19-34                               | 2.23<br>(-20.32, 24.78)                                     | 0.50<br>(-0.67, 1.67)                                                | 2.26<br>(-1.39, 5.92)                                       | -0.12<br>(-0.28, 0.04)                                 | 1.72<br>(-0.56, 4.00)                                         |
| Age 35+                                 | -25.55*<br>(-54.22, 3.12)                                   | 3.73***<br>(2.24, 5.22)                                              | 2.54<br>(-2.11, 7.18)                                       | -0.36***<br>(-0.54, -0.17)                             | 5.39***<br>(2.79, 8.00)                                       |
| <b>Maternal race</b>                    |                                                             |                                                                      |                                                             |                                                        |                                                               |
| White                                   | Reference                                                   | Reference                                                            | Reference                                                   | Reference                                              | Reference                                                     |
| Black or African-American               | -180.74***<br>(-195.45, -166.03)                            | 4.41***<br>(3.65, 5.17)                                              | 4.04***<br>(1.65, 6.42)                                     | -0.25***<br>(-0.34, -0.17)                             | 2.45***<br>(1.27, 3.62)                                       |
| <b>Maternal education</b>               |                                                             |                                                                      |                                                             |                                                        |                                                               |
| < 9th Grade                             | Reference                                                   | Reference                                                            | Reference                                                   | Reference                                              | Reference                                                     |
| 9th through 11th Grade                  | -36.88**<br>(-71.87, -1.88)                                 | 0.62<br>(-1.20, 2.44)                                                | -0.93<br>(-6.60, 4.74)                                      | -0.16<br>(-0.40, 0.07)                                 | 1.99<br>(-1.33, 5.31)                                         |
| High School Diploma or GED              | 8.43<br>(-26.16, 43.02)                                     | -0.70<br>(-2.50, 1.10)                                               | -2.40<br>(-8.01, 3.21)                                      | -0.10<br>(-0.33, 0.13)                                 | 0.73<br>(-2.52, 3.99)                                         |
| Some College or Higher                  | 39.54**<br>(4.42, 74.65)                                    | -1.81*<br>(-3.63, 0.02)                                              | -4.51<br>(-10.20, 1.18)                                     | -0.08<br>(-0.31, 0.15)                                 | 0.79<br>(-2.49, 4.06)                                         |



| <b>Marital Status</b> |                            |                            |                        |                       |                        |
|-----------------------|----------------------------|----------------------------|------------------------|-----------------------|------------------------|
| Unmarried             | Reference                  | Reference                  | Reference              | Reference             | Reference              |
| Married               | 52.91***<br>(40.46, 65.36) | -1.14***<br>(-1.78, -0.49) | -0.67<br>(-2.69, 1.35) | 0.01<br>(-0.06, 0.08) | -0.61<br>(-1.60, 0.38) |

\*p<0.1; \*\*p<0.05; \*\*\*p<0.01

Note: Ordinary least squares models with zip code and year fixed effects

GED= General Education Diploma

**eTable 5. Association of Eviction Actions During Pregnancy With Birth Outcomes, Including Mother Fixed Effects, Adjusted for Other Characteristics**

|                                         | Infant Birth Weight, Grams<br>N = 85,438<br>(95% CI) | Low Birth Weight, Percent of Births<br>N = 85,438<br>(95% CI) | Infant Deaths per Thousand<br>N = 85,438<br>(95% CI) | Gestational Age, Weeks<br>N= 42,697<br>(95% CI) | Premature, Percent of Births<br>N = 42,697<br>(95% CI) |
|-----------------------------------------|------------------------------------------------------|---------------------------------------------------------------|------------------------------------------------------|-------------------------------------------------|--------------------------------------------------------|
| <b>Eviction Action During Pregnancy</b> | <b>-18.87**</b><br>(-33.59, -4.15)                   | <b>0.56</b><br>(-0.32, 1.43)                                  | <b>1.10</b><br>(-2.11, 4.31)                         | <b>-0.04</b><br>(-0.14, 0.05)                   | <b>0.61</b><br>(-0.82, 2.04)                           |
| <b>Parity</b>                           |                                                      |                                                               |                                                      |                                                 |                                                        |
| Parity 1                                | Reference                                            | Reference                                                     | Reference                                            | Reference                                       | Reference                                              |
| Parity 2                                | 59.15***<br>(46.70, 71.60)                           | -2.65***<br>(-3.39, -1.90)                                    | -1.91<br>(-4.63, 0.80)                               | -0.15***<br>(-0.24, -0.06)                      | 0.74<br>(-0.64, 2.12)                                  |
| Parity 3                                | 62.49***<br>(45.50, 79.48)                           | -2.55***<br>(-3.57, -1.54)                                    | -0.09<br>(-3.79, 3.61)                               | -0.18***<br>(-0.31, -0.06)                      | 1.28<br>(-0.58, 3.13)                                  |
| Parity 4                                | 47.69***<br>(25.71, 69.66)                           | -1.91***<br>(-3.23, -0.60)                                    | -0.66<br>(-5.45, 4.13)                               | -0.32***<br>(-0.48, -0.16)                      | 3.98***<br>(1.61, 6.34)                                |
| Parity 5+                               | 36.59***<br>(9.22, 63.95)                            | -1.70**<br>(-3.33, -0.06)                                     | 0.97<br>(-5.00, 6.93)                                | -0.45***<br>(-0.64, -0.25)                      | 5.40***<br>(2.47, 8.33)                                |
| <b>Maternal Age</b>                     |                                                      |                                                               |                                                      |                                                 |                                                        |
| Age < 19                                | Reference                                            | Reference                                                     | Reference                                            | Reference                                       | Reference                                              |
| Age 19-34                               | -21.11**<br>(-40.52, -1.70)                          | 0.75<br>(-0.41, 1.91)                                         | 1.19<br>(-3.04, 5.43)                                | -0.08<br>(-0.25, 0.08)                          | 2.50**<br>(0.07, 4.94)                                 |
| Age 35+                                 | -46.54***<br>(-79.29, -13.79)                        | 2.30**<br>(0.34, 4.25)                                        | -3.14<br>(-10.28, 4.00)                              | -0.07<br>(-0.32, 0.19)                          | 4.00**<br>(0.20, 7.80)                                 |

p<0.1; \*\*p<0.05; \*\*\*p<0.01

Note: Ordinary least squares models with mother, zip code and year fixed effects

**eTable 6. Association of Eviction Actions During Pregnancy With Birth Outcomes Among Mothers With Only 1 Eviction Action, Adjusted for Other Characteristics**

|                                         | <b>Infant Birth Weight, Grams</b><br>N = 40,858<br>(95% CI) | <b>Low Birth Weight, Percent of Births</b><br>N = 40,858<br>(95% CI) | <b>Infant Deaths per Thousand</b><br>N = 40,858<br>(95% CI) | <b>Gestational Age, Weeks</b><br>N = 20,192<br>(95% CI) | <b>Premature, Percent of Births</b><br>N = 20,192<br>(95% CI) |
|-----------------------------------------|-------------------------------------------------------------|----------------------------------------------------------------------|-------------------------------------------------------------|---------------------------------------------------------|---------------------------------------------------------------|
| <b>Eviction Action During Pregnancy</b> | -44.95***<br>(-68.23, -21.68)                               | 1.55**<br>(0.36, 2.73)                                               | 5.56***<br>(1.92, 9.20)                                     | -0.16***<br>(-0.27, -0.04)                              | 1.78**<br>(0.11, 3.44)                                        |
| <b>Parity</b>                           |                                                             |                                                                      |                                                             |                                                         |                                                               |
| Parity 1                                | Reference                                                   | Reference                                                            | Reference                                                   | Reference                                               | Reference                                                     |
| Parity 2                                | 58.15***<br>(42.55, 73.76)                                  | -2.47***<br>(-3.27, -1.68)                                           | -0.81<br>(-3.25, 1.63)                                      | -0.12**<br>(-0.21, -0.03)                               | -0.12<br>(-1.45, 1.20)                                        |
| Parity 3                                | 64.43***<br>(47.28, 81.59)                                  | -2.13***<br>(-3.00, -1.25)                                           | -0.12<br>(-2.81, 2.56)                                      | -0.21***<br>(-0.31, -0.12)                              | 1.12<br>(-0.27, 2.52)                                         |
| Parity 4                                | 46.70***<br>(25.83, 67.56)                                  | -2.05***<br>(-3.11, -0.99)                                           | 0.44<br>(-2.83, 3.71)                                       | -0.26***<br>(-0.37, -0.15)                              | 1.63**<br>(0.02, 3.24)                                        |
| Parity 5+                               | 45.97***<br>(23.44, 68.51)                                  | -1.25**<br>(-2.40, -0.10)                                            | 1.31<br>(-2.22, 4.83)                                       | -0.36***<br>(-0.48, -0.25)                              | 4.13***<br>(2.45, 5.81)                                       |
| <b>Maternal Age</b>                     |                                                             |                                                                      |                                                             |                                                         |                                                               |
| Age <19                                 | Reference                                                   | Reference                                                            | Reference                                                   | Reference                                               | Reference                                                     |
| Age 19-34                               | -0.60<br>(-26.35, 25.15)                                    | 1.30*<br>(-0.02, 2.61)                                               | 1.26<br>(-2.77, 5.29)                                       | -0.07<br>(-0.24, 0.11)                                  | 1.96<br>(-0.55, 4.47)                                         |
| Age 35+                                 | -13.83<br>(-46.70, 19.03)                                   | 3.69***<br>(2.01, 5.36)                                              | 0.30<br>(-4.84, 5.45)                                       | -0.19*<br>(-0.40, 0.01)                                 | 4.08***<br>(1.14, 7.02)                                       |
| <b>Maternal Race</b>                    |                                                             |                                                                      |                                                             |                                                         |                                                               |
| White                                   | Reference                                                   | Reference                                                            | Reference                                                   | Reference                                               | Reference                                                     |
| Black or African-American               | -182.60***<br>(-198.48, -166.72)                            | 4.49***<br>(3.68, 5.30)                                              | 2.41*<br>(-0.07, 4.90)                                      | -0.27***<br>(-0.36, -0.18)                              | 2.40***<br>(1.12, 3.67)                                       |
| <b>Maternal Education</b>               |                                                             |                                                                      |                                                             |                                                         |                                                               |
| <9th Grade                              | Reference                                                   | Reference                                                            | Reference                                                   | Reference                                               | Reference                                                     |

|                            |                               |                            |                        |                           |                        |
|----------------------------|-------------------------------|----------------------------|------------------------|---------------------------|------------------------|
| 9th through 11th Grade     | -61.22***<br>(-99.57, -22.88) | 1.69*<br>(-0.26, 3.65)     | -0.77<br>(-6.77, 5.23) | -0.29**<br>(-0.55, -0.04) | 3.84**<br>(0.17, 7.51) |
| High School Diploma or GED | -8.32<br>(-46.21, 29.56)      | 0.04<br>(-1.89, 1.97)      | -2.63<br>(-8.56, 3.30) | -0.24*<br>(-0.49, 0.01)   | 2.79<br>(-0.81, 6.40)  |
| Some College or Higher     | 25.32<br>(-13.23, 63.87)      | -0.98<br>(-2.94, 0.99)     | -3.83<br>(-9.87, 2.20) | -0.17<br>(-0.42, 0.08)    | 2.23<br>(-1.41, 5.87)  |
|                            |                               |                            |                        |                           |                        |
| <b>Marital Status</b>      |                               |                            |                        |                           |                        |
| Unmarried                  | Reference                     | Reference                  | Reference              | Reference                 | Reference              |
| Married                    | 56.05***<br>(42.15, 69.94)    | -1.19***<br>(-1.89, -0.48) | -0.34<br>(-2.52, 1.83) | -0.02<br>(-0.10, 0.06)    | -0.36<br>(-1.48, 0.76) |

p<0.1; \*\*p<0.05; \*\*\*p<0.01

Notes: Ordinary least squares models with zip code and year fixed effects

GED= General Education Diploma

**eTable 7. Association of Eviction Actions During Pregnancy With Birth Outcomes in Atlanta, Georgia, Adjusted for Other Characteristics**

|                                         | <b>Infant Birth Weight, Grams</b><br>N = 14,332<br>(95% CI) | <b>Low Birth Weight, Percent of Births</b><br>N = 14,332<br>(95% CI) | <b>Infant Deaths per Thousand</b><br>N = 14,332<br>(95% CI) | <b>Gestational Age, Weeks</b><br>N = 6,855<br>(95% CI) | <b>Premature, Percent of Births</b><br>N = 6,855<br>(95% CI) |
|-----------------------------------------|-------------------------------------------------------------|----------------------------------------------------------------------|-------------------------------------------------------------|--------------------------------------------------------|--------------------------------------------------------------|
| <b>Eviction Action During Pregnancy</b> | <b>-38.97***</b><br>(-68.44, -9.49)                         | <b>2.46***</b><br>(0.89, 4.03)                                       | <b>0.37</b><br>(-4.32, 5.05)                                | <b>-0.18**</b><br>(-0.35, -0.02)                       | <b>1.61</b><br>(-0.70, 3.92)                                 |
| <b>Parity</b>                           |                                                             |                                                                      |                                                             |                                                        |                                                              |
| Parity 1                                | Reference                                                   | Reference                                                            | Reference                                                   | Reference                                              | Reference                                                    |
| Parity 2                                | 77.29***<br>(49.21, 105.37)                                 | -3.85***<br>(-5.34, -2.35)                                           | -5.91***<br>(-10.37, -1.45)                                 | -0.00<br>(-0.17, 0.17)                                 | -0.89<br>(-3.32, 1.55)                                       |
| Parity 3                                | 108.02***<br>(77.24, 138.81)                                | -3.58***<br>(-5.22, -1.93)                                           | -3.71<br>(-8.60, 1.18)                                      | 0.01<br>(-0.17, 0.19)                                  | -0.71<br>(-3.28, 1.86)                                       |
| Parity 4                                | 53.47***<br>(17.86, 89.08)                                  | -1.57<br>(-3.47, 0.33)                                               | -1.49<br>(-7.15, 4.17)                                      | -0.06<br>(-0.27, 0.15)                                 | 0.47<br>(-2.43, 3.37)                                        |
| Parity 5+                               | 40.14**<br>(5.43, 74.85)                                    | -0.57<br>(-2.43, 1.28)                                               | -1.53<br>(-7.05, 3.98)                                      | -0.26***<br>(-0.46, -0.07)                             | 5.15***<br>(2.41, 7.89)                                      |
| <b>Maternal Age</b>                     |                                                             |                                                                      |                                                             |                                                        |                                                              |
| Age < 19                                | Reference                                                   | Reference                                                            | Reference                                                   | Reference                                              | Reference                                                    |
| Age 19-34                               | 9.03<br>(-34.12, 52.19)                                     | 0.50<br>(-1.81, 2.80)                                                | 1.31<br>(-5.55, 8.16)                                       | 0.03<br>(-0.30, 0.36)                                  | 0.44<br>(-4.18, 5.07)                                        |
| Age 35+                                 | 13.20<br>(-43.87, 70.28)                                    | 2.91*<br>(-0.14, 5.95)                                               | -1.77<br>(-10.84, 7.30)                                     | -0.05<br>(-0.43, 0.33)                                 | 2.04<br>(-3.33, 7.41)                                        |
| <b>Maternal Race</b>                    |                                                             |                                                                      |                                                             |                                                        |                                                              |
| White                                   | Reference                                                   | Reference                                                            | Reference                                                   | Reference                                              | Reference                                                    |
| Black or African-American               | -187.36***<br>(-230.53, -144.18)                            | 4.73***<br>(2.43, 7.04)                                              | 0.89<br>(-5.97, 7.75)                                       | -0.15<br>(-0.43, 0.12)                                 | 2.42<br>(-1.45, 6.29)                                        |
| <b>Maternal Education</b>               |                                                             |                                                                      |                                                             |                                                        |                                                              |
| <9th Grade                              | Reference                                                   | Reference                                                            | Reference                                                   | Reference                                              | Reference                                                    |
| 9th through 11th Grade                  | -45.32<br>(-115.60, 24.95)                                  | 2.95<br>(-0.80, 6.70)                                                | -3.32<br>(-14.49, 7.85)                                     | -0.48<br>(-1.05, 0.09)                                 | 5.85<br>(-2.20, 13.91)                                       |
| High School Diploma or GED              | -2.88<br>(-72.96, 67.19)                                    | 0.76<br>(-2.98, 4.50)                                                | -3.35                                                       | -0.32<br>(-0.88, 0.25)                                 | 2.37<br>(-5.61, 10.35)                                       |

|                        |                              |                        |                            |                        |                        |
|------------------------|------------------------------|------------------------|----------------------------|------------------------|------------------------|
|                        |                              |                        | (-14.49,<br>7.78)          |                        |                        |
| Some College or Higher | 31.71<br>(-39.58,<br>103.00) | 0.26<br>(-3.55, 4.06)  | -2.72<br>(-14.05,<br>8.60) | -0.31<br>(-0.88, 0.27) | 2.28<br>(-5.75, 10.32) |
| <b>Marital Status</b>  |                              |                        |                            |                        |                        |
| Unmarried              | Reference                    | Reference              | Reference                  | Reference              | Reference              |
| Married                | 39.28**<br>(9.50, 69.06)     | -0.77<br>(-2.36, 0.82) | -4.82**<br>(-9.55, -0.09)  | -0.06<br>(-0.24, 0.12) | -0.32<br>(-2.80, 2.16) |

p<0.1; \*\*p<0.05; \*\*\*p<0.01

Ordinary least squares models with zip code and year fixed effects

GED= General Education Diploma
